# Supplementary material for: Pioglitazone Ameliorates Hippocampal Neurodegeneration, Disturbances in Glucose Metabolism and AKT/mTOR Signaling Pathways in Pentyelenetetrazole-Kindled Mice
Source: MDPI journal article supplement (doi:10.3390/ph15091113), 2022-09-06

# Pioglitazone ameliorates hippocampal neurodegeneration and disturbances in glucose metabolism and AKT/mTOR signalling pathways in Pentylenetetrazole-Kindled mice

## Supplementary materials

1. **Figure S1.** Western blot of beta actin (loading control)
2. **Figure S2.** Western blot of Akt
3. **Figure S3.** Western blot of 4EBP1
4. **Figure S4.** Western blot of AMPK

**Figure S1.** Western blot of beta actin (loading control)

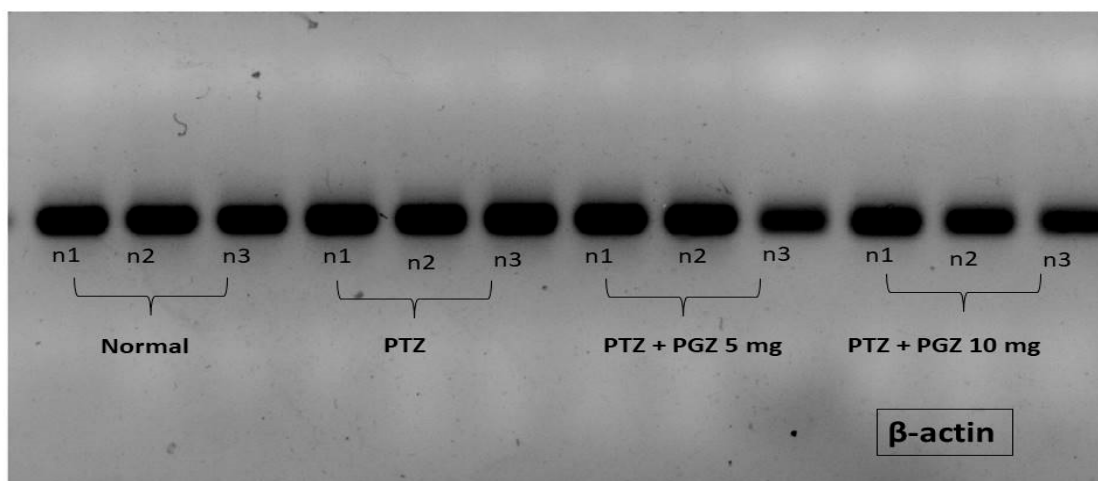

Figure S2. Western blot of Akt

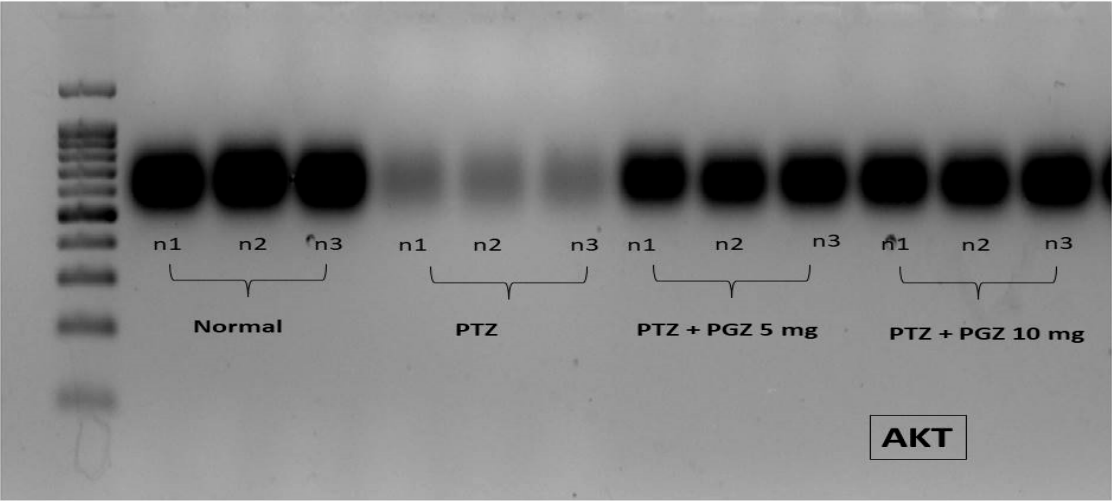

Figure S3. Western blot of 4EBP1

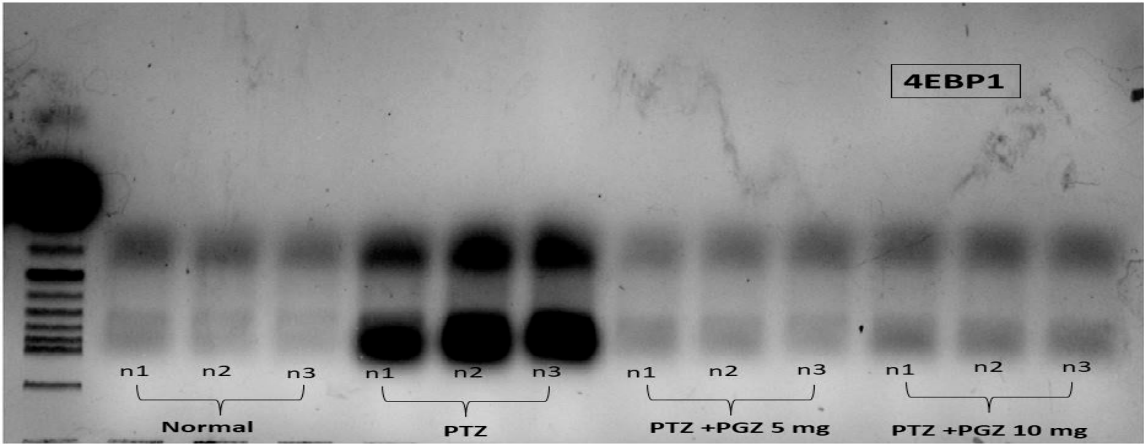

**Figure S4.** Western blot of AMPK

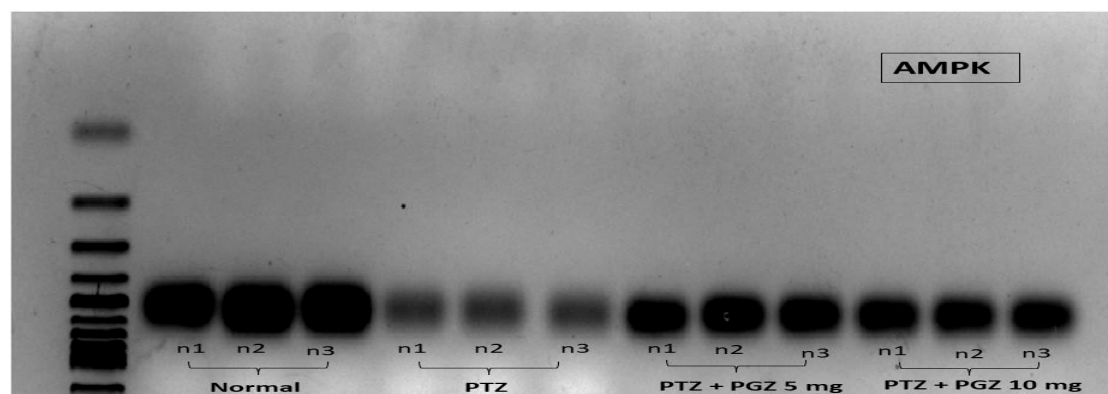

Supplement: s1 [file s1]
